# Supplementary material for: Engineering circular RNA regulators to specifically promote circular RNA production
Source: PubMed Central journal article supplement (PMC8210604; doi:10.7150/thno.56990), 2021-05-24
Supplement: thnov11p7322s1.pdf [file thnov11p7322s1.pdf]

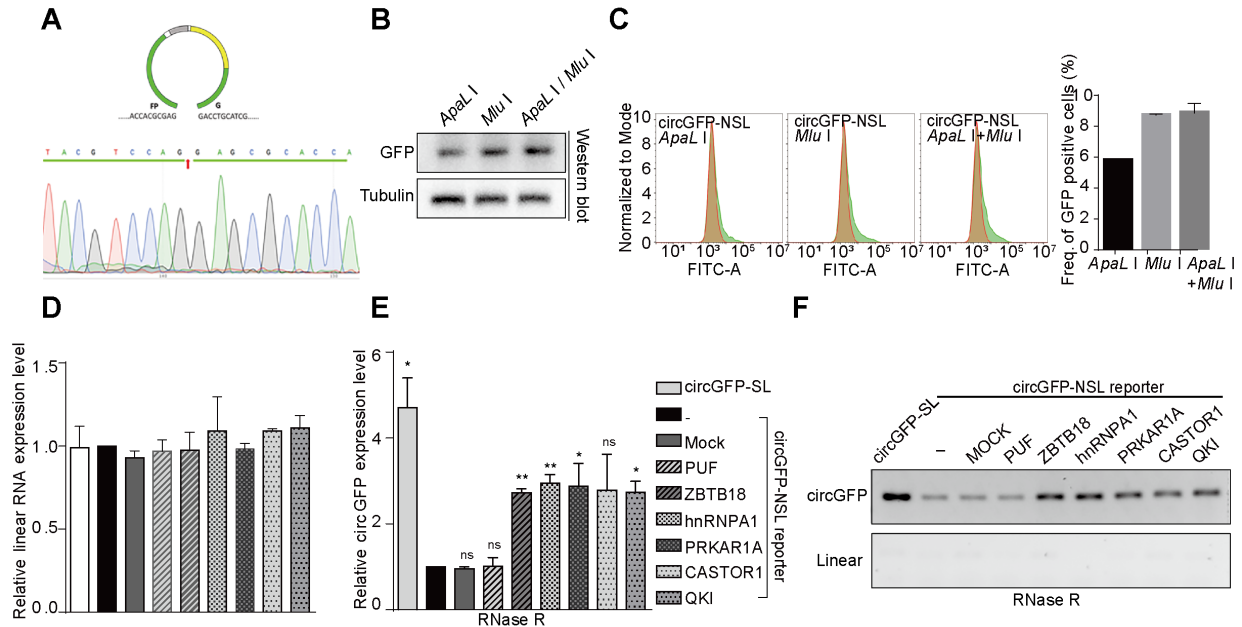

**Supplementary Figure S1. ECRRs promote the production of circGFP.** (A) The junction sequences of circGFP were validated with Sanger sequencing. (B-C) The circGFP reporter vector has single *Apa*L I and *Mlu* I enzyme sites in the plasmid backbone. The circGFP vector was linearized with *Apa*L I, *Mlu* I, or *Apa*L I/*Mlu* I digestion, and the resulting linearized DNA was transiently transfected into 293T cells to examine GFP expression at 36 h after transfection. The GFP protein was detected with western blot assay (B) and flow cytometry assay (C). (D) The gray-scale value of straps densities was quantified by Image J to detect linear RNA abundance from circGFP reporter in Fig1E. Three experiments were carried out with mean +/- SD plotted in each group. (E-F) The regulatory effects of different ECRRs on the biogenesis of circGFP in the presence of RNase R were determined using RT-PCR assay. The densities of signals were determined by Image J and three experiments were carried out with mean +/- SD of relative fold change of circGFP expression plotted in (E). The representative gel was shown in (F). \* indicates  $p < 0.05$ , \*\* indicates  $p < 0.01$ .

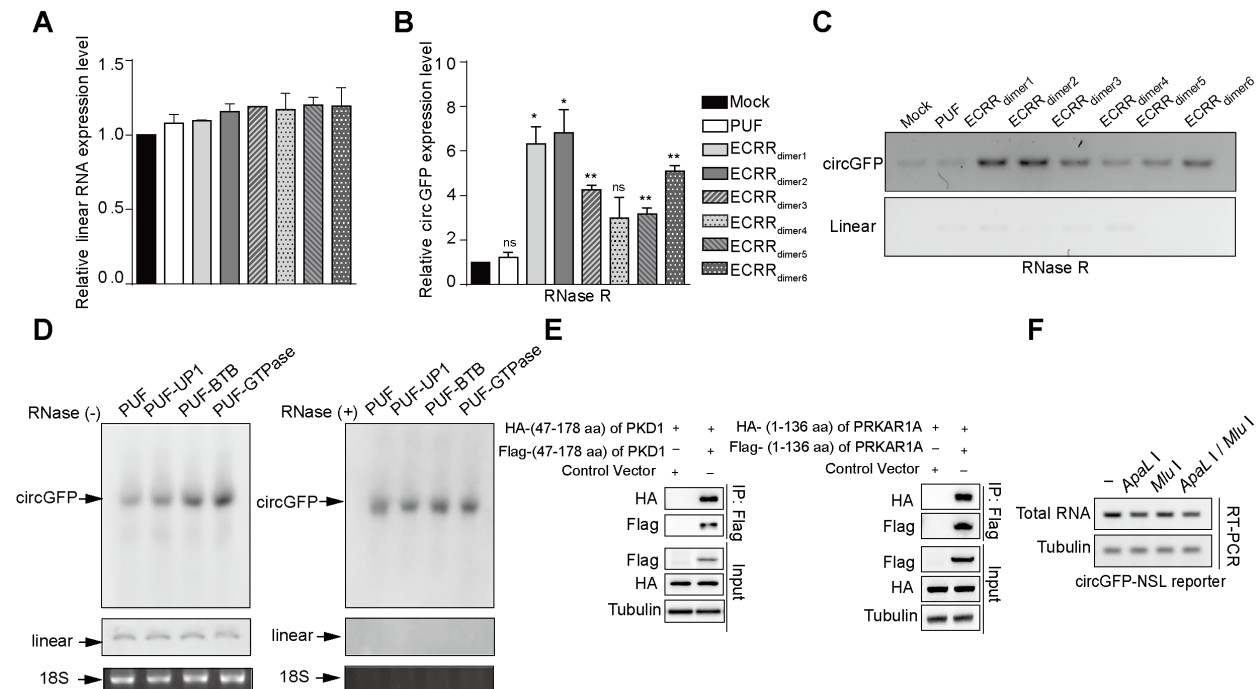

**Supplementary Figure S2.** Dimerization domain containing ECRRs stimulate the generation of circGFP. (A) The densities of RT-PCR bands were quantified by Image J to detect linear RNA abundance from circGFP reporter in Fig2B. Three experiments were carried out with mean +/- SD plotted in each group. (B-C) The regulatory effects of different ECRRs containing GTPase domain of ATL1, BTB domain of ZBTB18, DH domain of ITSN1, 47-178 aa of PKD1, 1-136 aa of PRKAR1A, and RRM domain of HNRNPA1 in the presence of RNase R on the biogenesis of circGFP were determined using RT-PCR assay. The densities of signals were determined by Image J and three experiments were carried out with mean +/- SD of relative fold change of circGFP expression plotted in (B). The representative gel was shown in (C). \* indicates  $p < 0.05$ , \*\* indicates  $p < 0.01$ . (D) The circGFP-NSL reporter was transiently co-transfected with different ECRRs or control vector. The production of circGFP and linear RNA was examined with the northern blot assay in the absence of presence of RNase R treatment. (E) The dimerization ability of 47-178 aa of PKD1, 1-136 aa of PRKAR1A were examined with a co-

immunoprecipitation assay. **(F)** 1  $\mu\text{g}$  of the linearized plasmids (*Apa*I or/and *Mlu*I) were transfected into 293T cells in 12-well plates to examine circGFP expression. To determine the circular and linear transfection efficiency, RNAs were isolated from the transfected cells to measure the efficiency by RT-PCR.

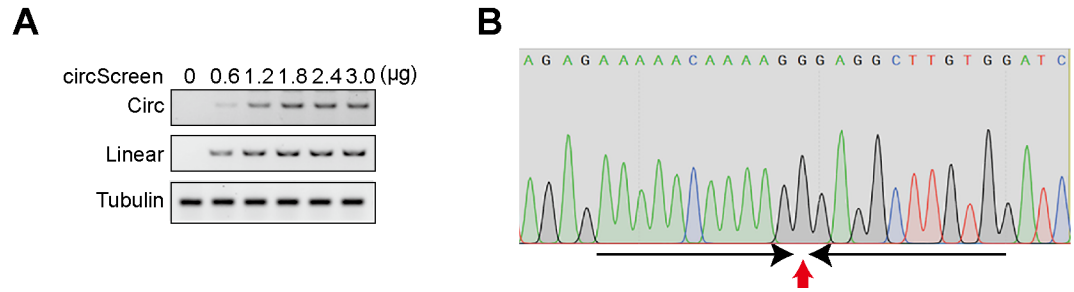

**Supplementary Figure S3.** ECRRs function in another circular RNA reporter. **(A)** The production of circular RNA and linear RNA of circScreen reporter was analyzed with the RT-PCR approach. The representative gels were shown. **(B)** The junction sequence of the circScreen reporter was verified with Sanger sequencing.

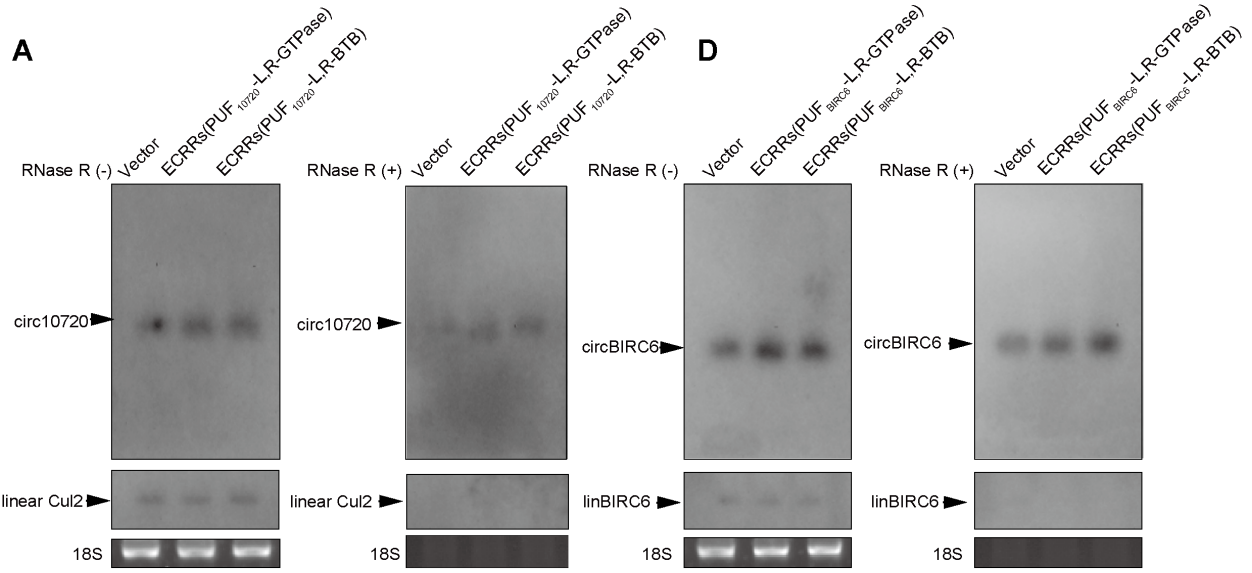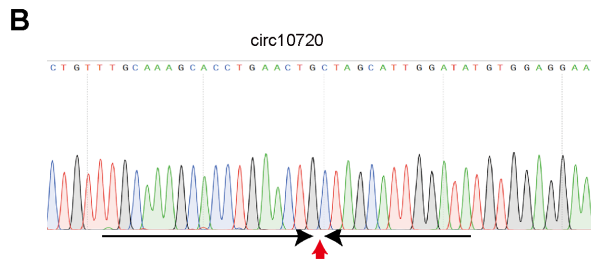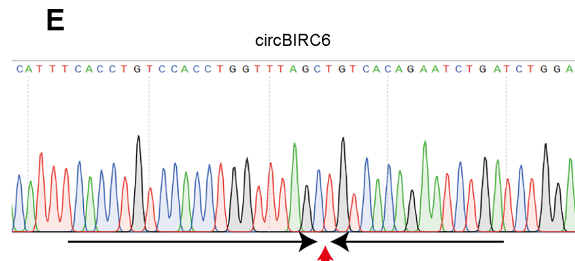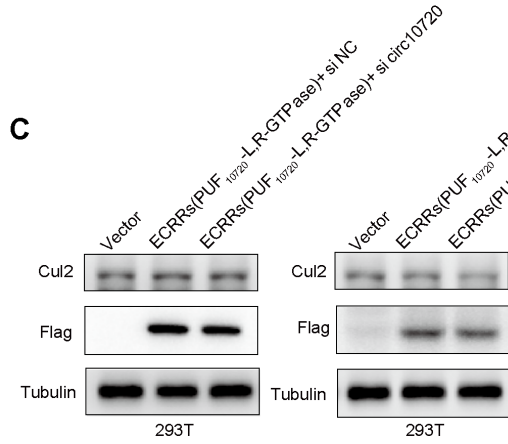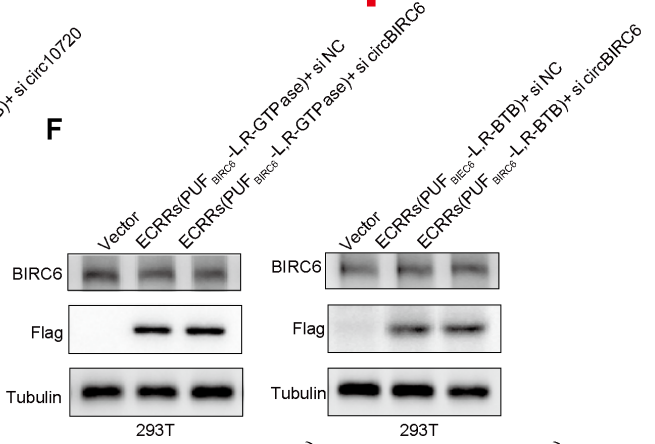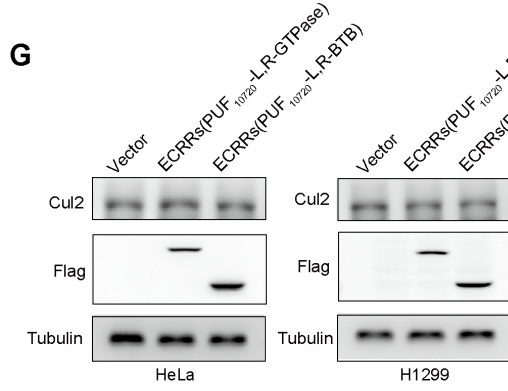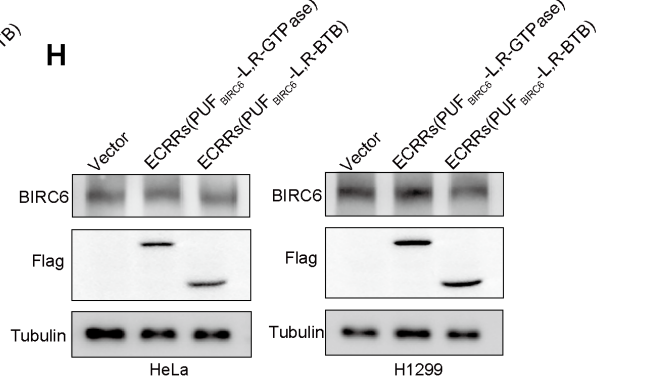

**Supplementary Figure S4.** ECRRs promote the production of endogenous circular RNAs. **(A)** The ECRRs(PUF<sub>10720</sub>-L, R-GTPase) or ECRRs(PUF<sub>10720</sub>-L, R-BTB) were used to promote the biogenesis of endogenous circ10720. The production of circ10720 and linear Cul2 RNA was examined with a northern blot assay in the absence (left) or presence (right) of RNase R. **(B)** The junction sequences of the endogenous circ10720 were verified with Sanger sequencing. **(C)** The protein levels of Cul2 and exogenously expressed ECRRs in 293T cells were determined with a western blot assay. **(D)** The ECRRs(PUF<sub>BIRC6</sub>-L, R-GTPase) or ECRRs(PUF<sub>BIRC6</sub>-L, R-BTB) were used to promote the biogenesis of endogenous circBIRC6. The production of circBIRC6 and linear BIRC6 RNA was examined with a northern blot assay in the absence (left) or presence (right) of RNase R. **(E)** The junction sequences of the endogenous circBIRC6 were verified with Sanger sequencing. **(F)** The protein levels of BIRC6 and exogenously expressed ECRRs in 293T cells were determined with a western blot assay. **(G)** The protein levels of Cul2, ECRR(PUF<sub>10720</sub>-GTPase) and ECRR(PUF<sub>10720</sub>-BTB) in HeLa and H1299 cells were examined with a western blot assay. **(H)** The protein levels of BIRC6, ECRR(PUF<sub>BIRC6</sub>-GTPase) and ECRR(PUF<sub>BIRC6</sub>-BTB) in HeLa and H1299 cells were examined with a western blot assay.

Supplementary Table S1

| Primer | Name          | Sequence                                             | Notes                                                                  |
|--------|---------------|------------------------------------------------------|------------------------------------------------------------------------|
| 1      | Gexon1f       | AGTGCTTCAGCCGCTACCC                                  | The primer pair used for testing circRNA from GFP reporter             |
| 2      | Gexon3r       | GTTGTACTIONCAGCTTGTGCC                               |                                                                        |
| 3      | Linear-F      | ACGTAAACGGCCACAAGTTC                                 | The primer pair used for testing linear RNA from GFP reporter          |
| 4      | Linear-R      | CTGAGGGCATCTTATTTGGG                                 |                                                                        |
| 5      | circScreen-F  | TGTGAGTTGGATAGTTGTGGAA                               | The primer pair used for testing circRNA from circScreen reporter      |
| 6      | circScreen-R  | GGGTGTTTACCTTACGCTTC                                 |                                                                        |
| 7      | Dendra2-F     | CAGAAGAAGACCCTGAAGTGG                                | The primer pair used for testing linear RNA from circScreen reporter   |
| 8      | Dendra2-R     | TTGTAGTCGCTGTGCTTGC                                  |                                                                        |
| 9      | circ-10720-F  | ATGCCAACACTATTTGTGGA                                 | The primer pair used for testing for endogenous circ-10720             |
| 10     | circ-10720-R  | CCCCATGGATTACTTTCTGGTTTGG                            |                                                                        |
| 11     | Cul2-F        | GGAATACGTCGAAAGAG                                    | The primer pair used for testing cul2 mRNA                             |
| 12     | Cul2-R        | AGCAAGGGTGCAGACTAT                                   |                                                                        |
| 13     | si circ-10720 | UAUCCAAUGCUAGCAGUUCAGG                               | siRNA used for circ10720 knockdown                                     |
| 14     | circBIRC6-F   | TCAAGGAGACCAACTTTGGC                                 | The primer pair used for testing endogenous circBIRC6                  |
| 15     | circBIRC6-R   | CTGGAGTTTGCAGAGCAGTG                                 |                                                                        |
| 16     | linBIRC6-F    | ATCAGGAGACCCAAGCTCAG                                 | The primer pair used for testing for endogenous circBIRC6              |
| 17     | linBIRC6-R    | ACTTCCATGGCTTCCTTCTG                                 |                                                                        |
| 19     | si circBIRC6  | UCAGAUUCUGUGACAGCUAAA                                | siRNA used for circBIRC6 knockdown                                     |
| 20     | QKI-F         | CCGACGCGTACCGGCAACGGCTCTC<br>AGATGGTCGGGGAAATGGAAACG | The primer pair used for cloning Quaking into pCI-neo vector           |
| 21     | QKI-R         | CACGCGGCCGCTTAGTTGCCGGTGG<br>CGGCTC                  |                                                                        |
| 22     | CASTOR1-F     | CCGACGCGTACCGGCAACGGCTCTC<br>AGATGGAGCTGCACATCCTAG   | The primer pair used for cloning CASTOR1 into pCI-neo vector           |
| 23     | CASTOR1-R     | CACGCGGCCGCTCAGGAAGCCAGGC<br>CTTCC                   |                                                                        |
| 23     | PKD1-F        | CCGACGCGTACCGGCAACGGCTCTCA<br>GTGCCGCGTCAACTGCTC     | The primer pair used for cloning 47-178 aa of PKD1 into pCI-neo vector |
| 25     | PKD1-R        | CACGCGGCCGCTTACTCACCACAGCC<br>ACTGTC                 |                                                                        |

|    |           |                                                                 |                                                                                                                              |
|----|-----------|-----------------------------------------------------------------|------------------------------------------------------------------------------------------------------------------------------|
| 26 | PRKAR1A-F | CCGACGCGTACCGGCAACGGCTCTCA<br>GATGGAGTCTGGCAGTACC               | The primer pair used for cloning PRKAR1A into pCI-neo vector                                                                 |
| 27 | PRKAR1A-R | CACGCGGCCGCTCAGACAGACAGTGA<br>CAC                               |                                                                                                                              |
| 28 | DH-F      | CCGACGCGTACCGGCAACGGCTCTCA<br>GAAGCGACAAGGATACATCC              | The primer pair used for cloning DH domain of                                                                                |
| 29 | DH-R      | CACGCGGCCGCTTACCCTTCGTTCCACC<br>TGG                             | ITSN1 into pCI-neo vector                                                                                                    |
| 30 | ZBTB18-F  | CCGACGCGTACCGGCAACGGCTCTCAG<br>ATGTGTCCTAAAGTTATGAAG            | The primer pair used for cloning ZBTB18 into pCI-neo vector                                                                  |
| 31 | ZBTB18-R  | CACGCGGCCGCTTATTTCCAAAGTTCTTG                                   |                                                                                                                              |
| 32 | BTB-F     | CCGACGCGTACCGGCAACGGCTCTCAGT<br>GTGACTGCACTGTTCTG               | The primer pair used for cloning the BTB domain of                                                                           |
| 33 | BTB-R     | CACGCGGCCGCTTAGTCTTTGAACTGGA<br>GTTTC                           | ZBTB18 into pCI-neo vector                                                                                                   |
| 34 | HNRNPA1-F | CCGACGCGTACCGGCAACGGCTCTCAGA<br>TGTCTAAGTCAGAGTCTCC             | The primer pair used for cloning HNRNPA1 into pCI-neo vector                                                                 |
| 35 | HNRNPA1-R | CACGCGGCCGCTTAAAATCTTCTGCCACT<br>GCC                            |                                                                                                                              |
| 36 | UP1-R     | CACGCGGCCGCTTACTCTTGCTTTGACA<br>GGGCTTTTC                       | The primer with HNRNPA1-F used for cloning the UP1 domain of HNRNPA1                                                         |
| 37 | GTPase-F  | CCGACGCGTACCGGCAACGGCTCTCAG<br>ACATATGAATGGAGCTCAGAAG           | The primer pair used for cloning the GTPase domain of                                                                        |
| 38 | GTPase-R  | CACGCGGCCGCTTAGGTACGAGCTGCA<br>TGGAAAG                          | ATL1 into pCI-neo vector                                                                                                     |
| 39 | flagNls-F | CCGCTCGAGCCATGGACTACAAGGACGA<br>CGATGACAAGCCCAAGAAAAAGAGGAAG    | The primer pair used for cloning FLAG-NLS-PUF                                                                                |
| 40 | EcoPUF-F  | CCCAAGAAAAAGAGGAAGGTAGAATTCG<br>GCCGCAGCCGCTTTTGGAAAG           | into pCI-neo vector                                                                                                          |
| 41 | PUF-Mlu-R | CCGACGCGTCCCTAAGTCAACACCGTTC<br>TT                              |                                                                                                                              |
| 42 | pLVX -F   | CCGCCCGGGCCATGGACTACAAGGACGA<br>CG                              | The primer pair with GTPase-R or BTB-R used for clone ECRR <sub>10720</sub> /BIRC6 into pLVX-Puro vector.                    |
| 43 | HAnIs-F   | ccgCTCGAGccatgTACCCATACGACGTCCC<br>AGACTACGCTCCCAAGAAAAAGAGGAAG | The primer with reverse primers of different dimerized protein or domains used for cloning HA-tag ECRRs into pCI-neo vector. |



|    |                   |                                               |                 |
|----|-------------------|-----------------------------------------------|-----------------|
| 44 | T7-circGFP-R      | TAATACGACTCACTATAGGGTTACTTGTAC<br>AGCTCGTCC   | Northern probes |
| 45 | GFP-probe-F       | ATGGTGAGCAAGGGCGAGG                           | Northern probes |
| 46 | T7-linear-R       | TAATACGACTCACTATAGGG<br>GCTGTCCCAGTCCTCTATCC  | Northern probes |
| 47 | linear-probe-F    | ATCACATCTTTAAGCCTTCCAT                        | Northern probes |
| 48 | T7-circBIRC6-R    | TAATACGACTCACTATAGGGCT<br>GGAGTTTGCAGAGCAGTG  | Northern probes |
| 49 | BIRC6-probe-F     | TCAAGGAGACCAACTTTGGC                          | Northern probes |
| 50 | T7-preBIRC6-R     | TAATACGACTCACTATAGGGAC<br>CAAGCCTGGCCTAATTCT  | Northern probes |
| 51 | T7-cul2-R         | TAATACGACTCACTATAGGGGTGGACACA<br>GCACGGAGTAAG | Northern probes |
| 52 | cul2-probe-F      | CGTGGTGGAGAAGACCCAAACC                        | Northern probes |
| 53 | T7-circ10720-R    | TAATACGACTCACTATAGGGTGTTCAGT<br>CAGAAAGGGAGA  | Northern probes |
| 54 | circ10720-probe-F | GCCAACACTATTTGTGGAGTC                         | Northern probes |
